# Supplementary material for: Sterol regulatory element‐binding protein‐1c orchestrates metabolic remodeling of white adipose tissue by caloric restriction
Source: PubMed Central journal article supplement (PMC5418191; doi:10.1111/acel.12576), 2017-03-03
Supplement: ACEL-16-508-s001.pdf [file ACEL-16-508-s001.pdf]

Figure S1

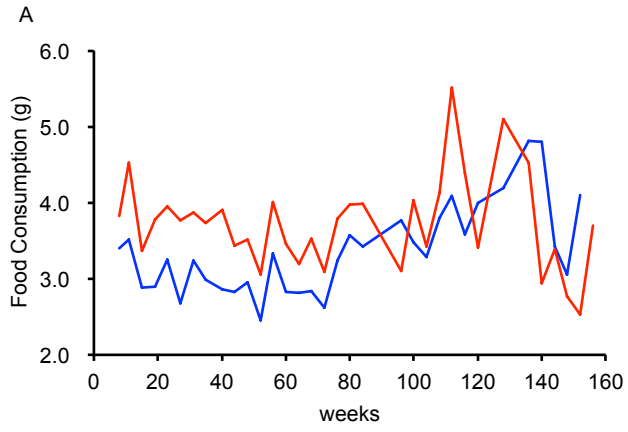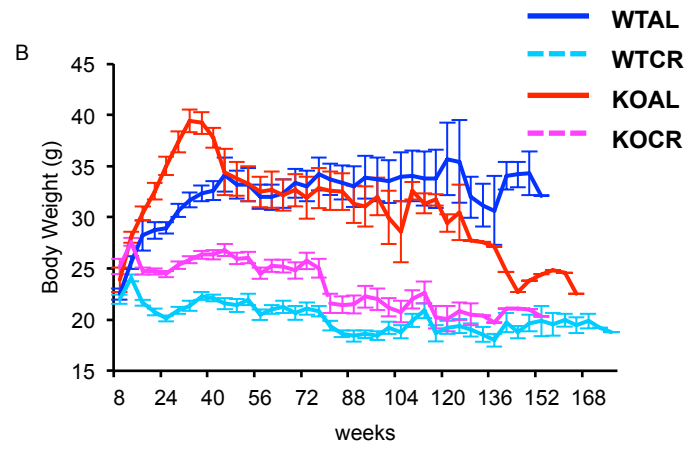

# Figure S2

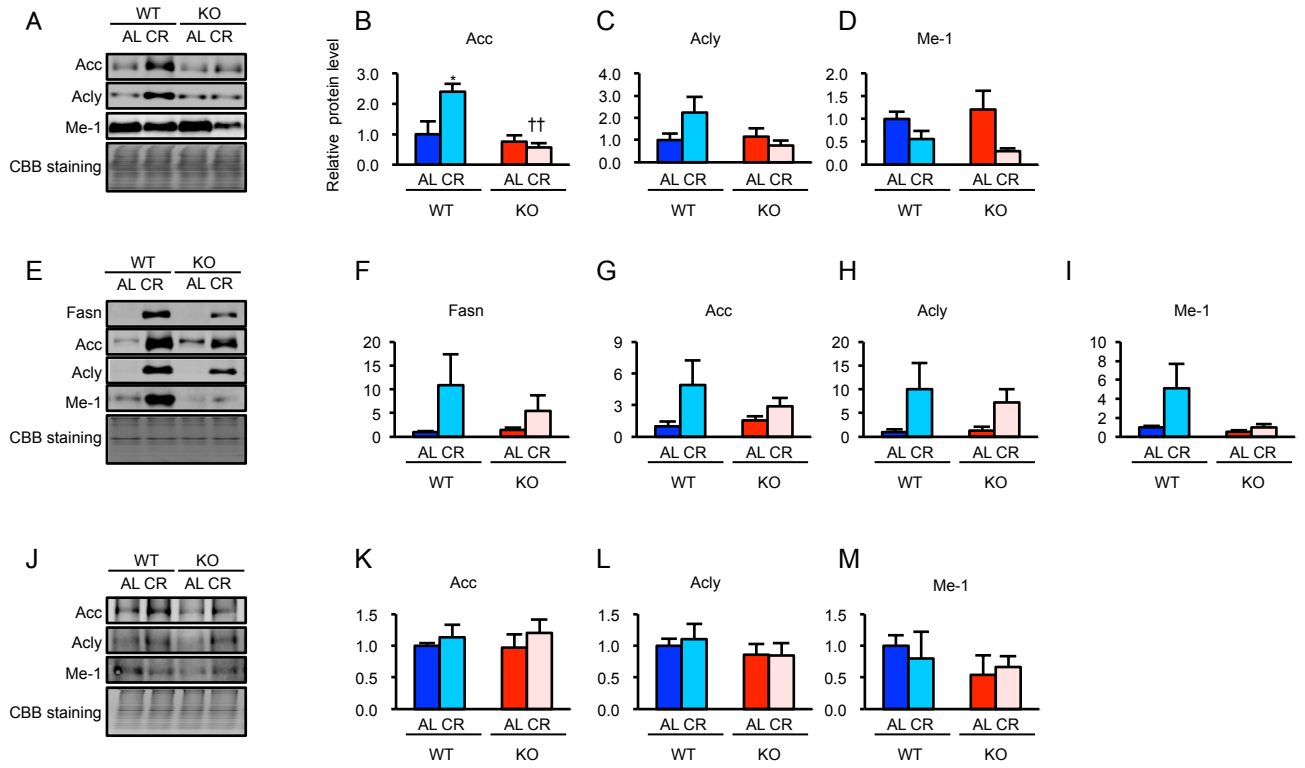

# Figure S3

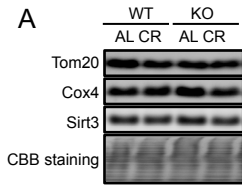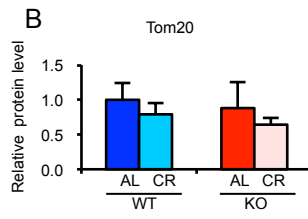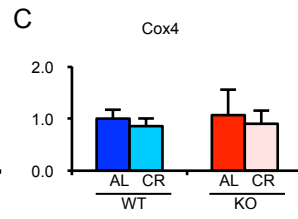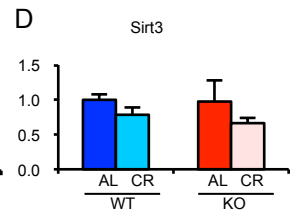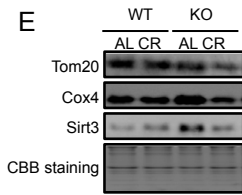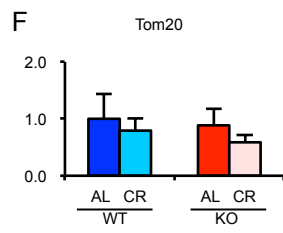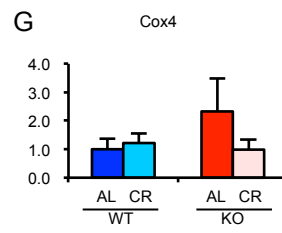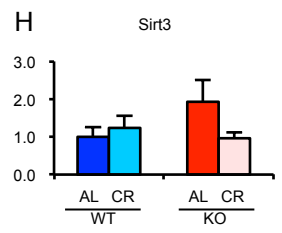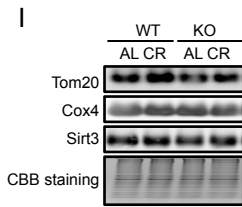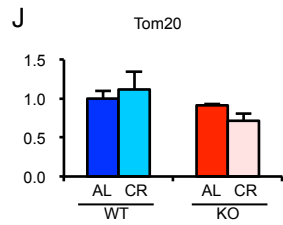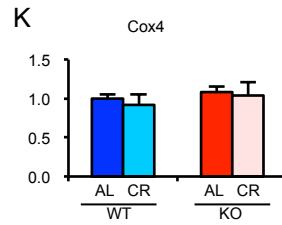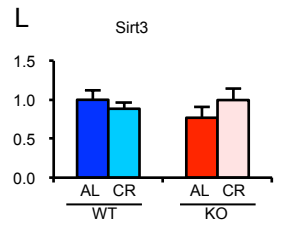

Figure S4

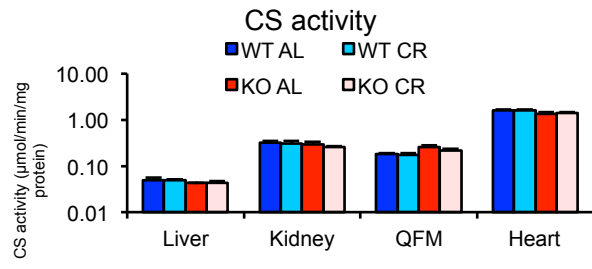

# Figure S5

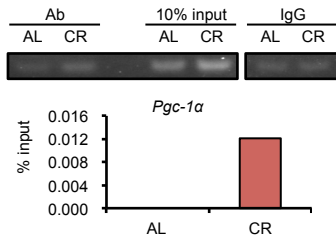

Figure S6

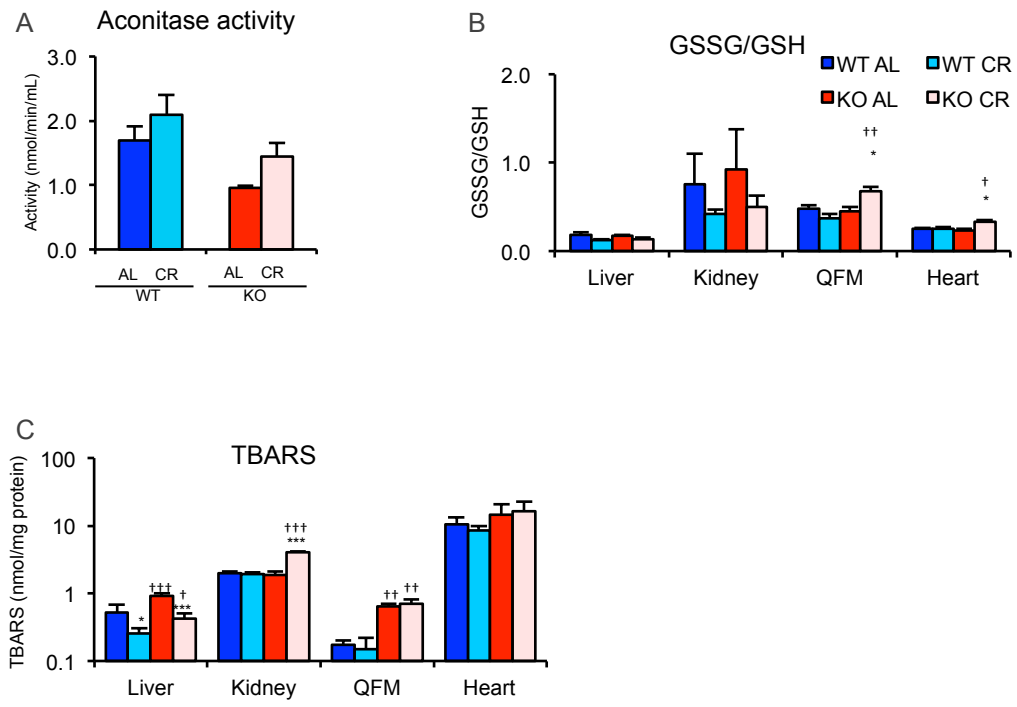

# Figure S7

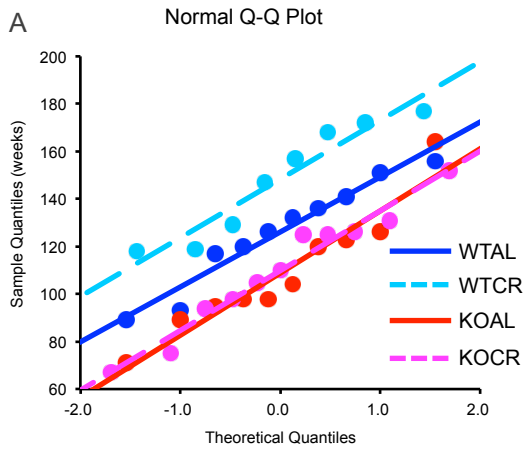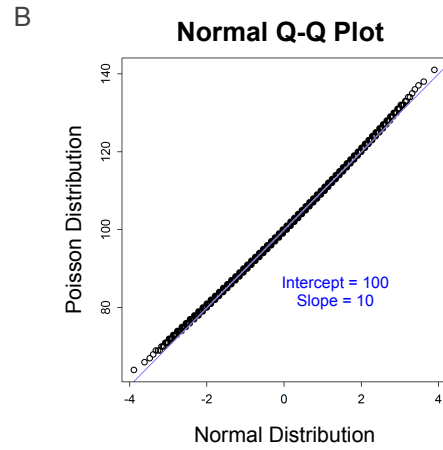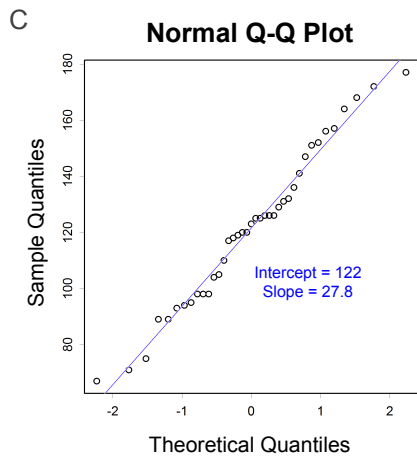

# Table S1

| Body and tissue weight |     | WT            |                 | KO              |                  |
|------------------------|-----|---------------|-----------------|-----------------|------------------|
|                        |     | AL            | CR              | AL              | CR               |
| Body weight            | (g) | 29.97 ± 0.89  | 21.78 ± 0.53 *  | 37.27 ± 1.81 †  | 26.11 ± 0.87     |
| Liver                  | (g) | 1.018 ± 0.035 | 0.821 ± 0.024   | 1.358 ± 0.073 † | 1.038 ± 0.037 *† |
| WAT                    | (g) | 0.915 ± 0.105 | 0.230 ± 0.027 * | 1.227 ± 0.152   | 0.327 ± 0.031 *  |
| BAT                    | (g) | 0.099 ± 0.008 | 0.078 ± 0.006   | 0.155 ± 0.025   | 0.086 ± 0.009 *  |
| Heart                  | (g) | 0.146 ± 0.004 | 0.119 ± 0.003   | 0.198 ± 0.010 † | 0.150 ± 0.007 *† |
| Kidney                 | (g) | 0.197 ± 0.006 | 0.144 ± 0.003 * | 0.235 ± 0.012 † | 0.156 ± 0.008 *  |

Each value represents the means ± S.E.M. \*, p<0.05 vs. AL, †, p<0.05 vs WT analyzed by Tukey's test



## Table S2

| WTAL  |                         | WTCR  |                         | KOAL  |                         | KOCR  |                         |
|-------|-------------------------|-------|-------------------------|-------|-------------------------|-------|-------------------------|
| Mouse | Age at Death<br>(Weeks) | Mouse | Age at Death<br>(Weeks) | Mouse | Age at Death<br>(Weeks) | Mouse | Age at Death<br>(Weeks) |
| 1     | 89                      | 1     | 118                     | 1     | 71                      | 1     | 67                      |
| 2     | 93                      | 2     | 119                     | 2     | 89                      | 2     | 75                      |
| 3     | 117                     | 3     | 129                     | 3     | 95                      | 3     | 94                      |
| 4     | 120                     | 4     | 147                     | 4     | 98                      | 4     | 98                      |
| 5     | 126                     | 5     | 157                     | 5     | 104                     | 5     | 105                     |
| 6     | 132                     | 6     | 168                     | 6     | 120                     | 6     | 110                     |
| 7     | 136                     | 7     | 172                     | 7     | 123                     | 7     | 125                     |
| 8     | 141                     | 8     | 177                     | 8     | 126                     | 8     | 125                     |
| 9     | 151                     |       |                         | 9     | 152                     | 9     | 126                     |
| 10    | 156                     |       |                         | 10    | 164                     | 10    | 131                     |
|       |                         |       |                         |       |                         | 11    | 152                     |
